# Supplementary material for: Tailoring a hierarchical porous carbon electrode from carbon black via 3D diatomite morphology control for enhanced electrochemical performance
Source: Royal Society of Chemistry journal article supplement (doi:10.1039/d4na00680a), 2024-01-01
Supplement: d4na00680a1.pdf [file d4na00680a1.pdf]

## Tailoring Hierarchical Porous Carbon Electrode from Carbon Black via 3D Diatomite Morphology Control for Enhanced Electrochemical Performance

Eugene Sefa Appiah<sup>a, b\*</sup>, Kwadwo Mensah-Darkwa<sup>a, c\*</sup>, Anthony Andrews<sup>a</sup>, Frank Ofori Agyemang<sup>a</sup>, Martinson Addo Nartey<sup>a</sup>, Katlego Makgopa<sup>d</sup>, Yongdan Hou<sup>e, f\*</sup> Patrick Aggrey<sup>g</sup>, David Ato Quansah<sup>h</sup>

<sup>a</sup>Department of Materials Engineering, College of Engineering, Kwame Nkrumah University of Science and Technology, Kumasi, Ghana; [appiaheugenesefa@gmail.com](mailto:appiaheugenesefa@gmail.com); [kmdarkwa.coe@knust.edu.gh](mailto:kmdarkwa.coe@knust.edu.gh); [anthonydrews@gmail.com](mailto:anthonydrews@gmail.com); [foagyemang88@gmail.com](mailto:foagyemang88@gmail.com); [maddonartey@knust.edu.gh](mailto:maddonartey@knust.edu.gh).

<sup>b</sup>Department of Sustainable Mineral Resource Development, University of Energy and Natural Resources, Sunyani, Ghana; [appiaheugenesefa@gmail.com](mailto:appiaheugenesefa@gmail.com)

<sup>c</sup>The Brew-Hammond Energy Centre, Kwame Nkrumah University of Science and Technology (KNUST), Kumasi, Ghana; [kmdarkwa.coe@knust.edu.gh](mailto:kmdarkwa.coe@knust.edu.gh)

<sup>d</sup>Department of Chemistry, Faculty of Science, Tshwane University of Technology, Pretoria, South Africa; [Makgopak@tutac.za](mailto:Makgopak@tutac.za)

<sup>e</sup>Hubei Key Laboratory of Energy Storage and Power Battery, and School of Materials Science and Engineering, Hubei University of Automotive Technology, Shiyan, China; [yongdan.hou@huat.edu.cn](mailto:yongdan.hou@huat.edu.cn)

<sup>f</sup>Shiyan Industrial Technology Research Institute of Chinese Academy of Engineering, Shiyan, China; [yongdan.hou@huat.edu.cn](mailto:yongdan.hou@huat.edu.cn)

<sup>g</sup>Hierarchically Structured Materials Laboratory, Skolkovo Institute of Science and Technology, 121205 Moscow, Russia; [Patrick.aggrey@skoltech.ru](mailto:Patrick.aggrey@skoltech.ru)

<sup>h</sup>Department of Mechanical Engineering, College of Engineering, Kwame Nkrumah University of Science and Technology, Kumasi, Ghana; [daquansah.coe@knust.edu.gh](mailto:daquansah.coe@knust.edu.gh)

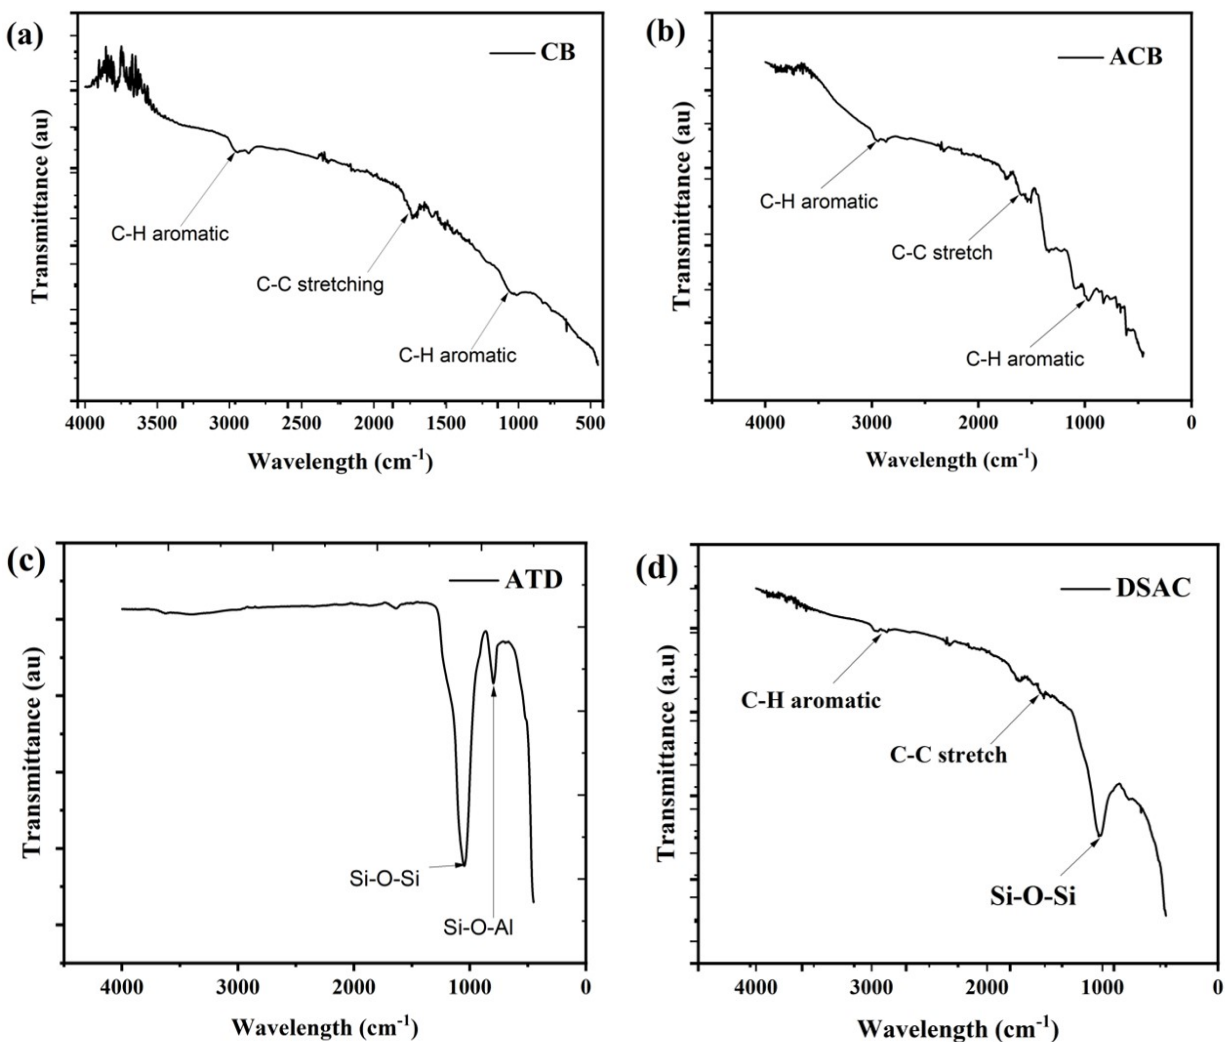

*Figure S1. Fourier transmission infrared transmittance of (a) CB, (b) ACB, (c) ATD, and (d) DSAC samples*

**Figure S1 (a-d)** shows the FTIR spectra of the CB, ACB, ATD, and DSAC samples plotted individually to reveal the various functional groups and their respective wavenumbers as described in the **Figure 2** within the manuscript.

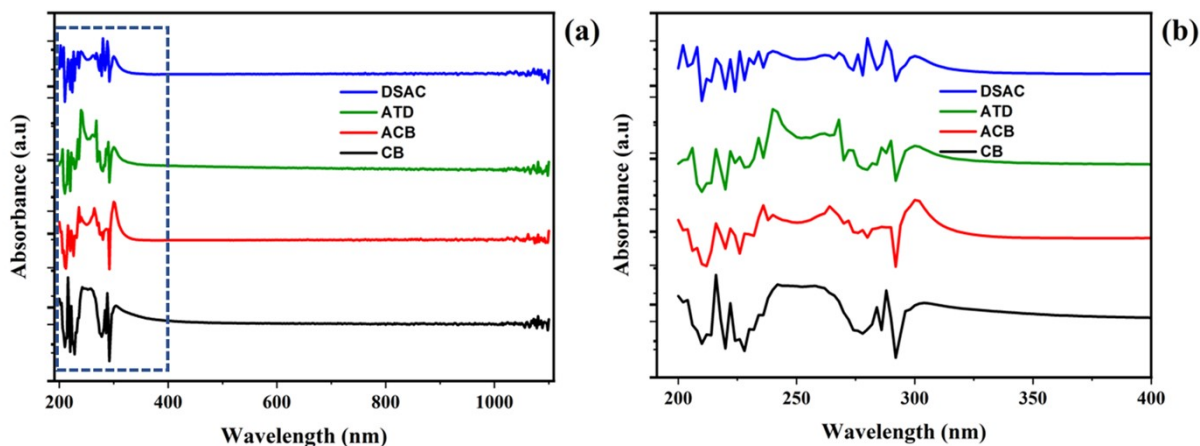

Figure S2. (a) UV-Vis absorption spectra of CB, ACB, ATD, and DSAC samples and (b) zoomed-in section of Figure (a) at a wavelength of 200 to 400 nm.

The UV-Vis absorption spectra of the CB, ACB, ATD, and DSAC samples with a zoom-in section are displayed in **Figure S2** showing variations between the wavenumber of 1050 to 1100 nm resulting from equipment wave changes [1] for all the samples. The studied samples (CB, ACB, ATD, and DSAC) have both saturated and unsaturated compounds at near 200 nm and 400 nm wavelength respectively (see **Figure S2 (a)** and **(b)**). Thus, the saturated compound in the studied samples comprises of carbon-carbon single bonds saturated with hydrogen atoms as observed in CB ACB, and DSAC samples. However aside from the saturated carbons, the DSAC sample also exhibited Si-O-Si and Si-O-Al functional groups as revealed in Fourier transmission infra-red (FTIR) spectra (see **Figure S1**) whereas unsaturated compounds include double-bonded, triple-bonded, and free radical compounds resulting from the production process of CB or the presence of impurities in CB [2] where revealed in **Figure S2**.

## References

1. Han D, Meng Z, Wu D, Zhang C, Zhu H (2011) Thermal properties of carbon black aqueous nanofluids for solar absorption. *Nanoscale Res Lett* 6:1–7
2. Sharif Sh. M, Golestani Fard F, Khatibi E, Sarpoolaky H (2009) Dispersion and stability of carbon black nanoparticles, studied by ultraviolet-visible spectroscopy. *J Taiwan Inst Chem Eng* 40:524–527
